# Supplementary material
Source: PubMed Central journal article supplement (PMC2842903)
Supplement: NIHMS131739-supplement-1_si_001.pdf [file NIHMS131739-supplement-1_si_001.pdf]

Supplementary Table 1: Deuterium Incorporation for IIa with the peptides GpIb $\alpha$ ,  $\gamma'$  and Hirudin and the protein fragment GpIb $\alpha$  (1-290) 3Y<sub>S</sub> and 2Y<sub>S</sub> at pH 6.5.

| Residues  | Theo.<br>D <sub>max</sub> <sup>a</sup> | 1 Minute   |           |               |           |                 |                 |
|-----------|----------------------------------------|------------|-----------|---------------|-----------|-----------------|-----------------|
|           |                                        | 20:1       |           | 40:1          | 1.6:1     |                 |                 |
|           |                                        | IIa        | Hirudin   | GpIb $\alpha$ | $\gamma'$ | 2Y <sub>S</sub> | 3Y <sub>S</sub> |
| -13 to -4 | 8.5                                    | 3.7 ± 0.1  | 3.4 ± 0.1 | 2.6 ± 0.1     | 2.4 ± 0.1 | 3.0 ± 0.2       | 2.4 ± 0.0       |
| 46-52     | 6.6                                    | 0.4 ± 0.0  | 0.4 ± 0.0 | 0.4 ± 0.0     | 0.4 ± 0.0 | 0.3 ± 0.1       | 0.4 ± 0.1       |
| 65-84     | 21.8                                   | 9.6 ± 0.1  | 4.2 ± 0.2 | 6.2 ± 0.1     | 5.3 ± 0.1 | 7.9 ± 0.3       | 6.7 ± 0.0       |
| 85-99     | 15.2                                   | 4.8 ± 0.1  | 4.3 ± 0.2 | 2.8 ± 0.1     | 2.9 ± 0.2 | 3.6 ± 0.2       | 2.9 ± 0.1       |
| 106-113   | 6.7                                    | 1.6 ± 0.0  | 1.2 ± 0.1 | 1.0 ± 0.1     | 1.1 ± 0.1 | n/a             | n/a             |
| 106-116   | 9.8                                    | 2.0 ± 0.1  | 1.6 ± 0.1 | 1.4 ± 0.1     | 1.4 ± 0.1 | 1.8 ± 0.1       | 1.5 ± 0.1       |
| 135-149D  | 19.4                                   | 8.4 ± 0.1  | 7.4 ± 0.1 | 7.3 ± 0.2     | n/a       | 7.4 ± 0.1       | 7.4 ± 0.1       |
| 173-180   | 7.8                                    | 1.8 ± 0.1  | 1.4 ± 0.1 | 1.4 ± 0.1     | 1.2 ± 0.1 | n/a             | n/a             |
| 173-181   | 8.8                                    | 1.8 ± 0.0  | 1.7 ± 0.2 | 1.3 ± 0.1     | 1.1 ± 0.0 | 1.2 ± 0.1       | 1.2 ± 0.1       |
| 202-207   | 6.8                                    | 2.3 ± 0.0  | 2.3 ± 0.1 | 2.0 ± 0.1     | 1.8 ± 0.0 | n/a             | n/a             |
| Residues  | Theo.<br>D <sub>max</sub>              | 10 Minutes |           |               |           |                 |                 |
|           |                                        | 20:1       |           | 40:1          | 1.6:1     |                 |                 |
|           |                                        | IIa        | Hirudin   | GpIb $\alpha$ | $\gamma'$ | 2Y <sub>S</sub> | 3Y <sub>S</sub> |
| -13 to -4 | 8.5                                    | 3.8 ± 0.0  | 3.9 ± 0.1 | 3.6 ± 0.0     | 3.2 ± 0.0 | 3.7 ± 0.0       | 3.4 ± 0.1       |
| 46-52     | 6.6                                    | 0.5 ± 0.0  | 0.5 ± 0.0 | 0.4 ± 0.0     | 0.4 ± 0.0 | 0.4 ± 0.0       | 0.4 ± 0.0       |
| 65-84     | 21.8                                   | 10.2 ± 0.1 | 6.1 ± 0.1 | 9.2 ± 0.1     | 8.2 ± 0.1 | 9.6 ± 0.1       | 9.3 ± 0.1       |
| 85-99     | 15.2                                   | 6.6 ± 0.2  | 6.9 ± 0.1 | 4.7 ± 0.1     | 5.0 ± 0.1 | 5.5 ± 0.1       | 5.0 ± 0.1       |
| 106-113   | 6.7                                    | 2.2 ± 0.1  | 2.2 ± 0.0 | 1.7 ± 0.1     | 1.8 ± 0.1 | n/a             | n/a             |
| 106-116   | 9.8                                    | 2.8 ± 0.1  | 2.7 ± 0.0 | 2.1 ± 0.0     | 2.2 ± 0.1 | 2.5 ± 0.1       | 2.4 ± 0.1       |
| 135-149D  | 19.4                                   | 8.9 ± 0.1  | 7.5 ± 0.1 | 8.2 ± 0.1     | n/a       | 7.9 ± 0.0       | 8.0 ± 0.1       |
| 173-180   | 7.8                                    | 2.6 ± 0.1  | 2.5 ± 0.0 | 1.7 ± 0.0     | 1.7 ± 0.1 | n/a             | n/a             |
| 173-181   | 8.8                                    | 2.8 ± 0.1  | 2.7 ± 0.1 | 1.6 ± 0.0     | 1.7 ± 0.0 | 1.9 ± 0.1       | 1.8 ± 0.1       |
| 202-207   | 6.8                                    | 2.6 ± 0.1  | 2.5 ± 0.1 | 2.4 ± 0.0     | 2.4 ± 0.1 | n/a             | n/a             |

<sup>a</sup>The maximum number of exchangeable protons within the indicated peptide, assuming 100% deuteration. A fully deuterated peptide would theoretically have acquired this amount of deuterons.

Supplementary Table 2: Deuterium Incorporation for IIa (pH 7.5 and 5.6) with the peptides GpIb $\alpha$ ,  $\gamma'$ , and Hirudin at pH 5.6

| Residues  | Theo.<br>D <sub>max</sub> <sup>a</sup> | 1 Minute   |            |               |           |           |
|-----------|----------------------------------------|------------|------------|---------------|-----------|-----------|
|           |                                        | IIa        |            | 20:1          |           |           |
|           |                                        | 5.6        | 7.5        | GpIb $\alpha$ | $\gamma'$ | Hirudin   |
| -13 to -4 | 8.5                                    | 3.4 ± 0.1  | 3.2 ± 0.1  | 2.2 ± 0.0     | 2.7 ± 0.0 | 2.8 ± 0.1 |
| 46-52     | 6.6                                    | 0.4 ± 0.0  | 0.4 ± 0.0  | 0.4 ± 0.0     | 0.4 ± 0.0 | 0.4 ± 0.0 |
| 65-84     | 21.8                                   | 9.4 ± 0.2  | 8.2 ± 0.2  | 5.7 ± 0.0     | 6.7 ± 0.0 | 3.5 ± 0.2 |
| 85-99     | 15.2                                   | 6.0 ± 0.1  | 3.7 ± 0.1  | 2.0 ± 0.1     | 2.2 ± 0.1 | 3.3 ± 0.3 |
| 106-113   | 6.7                                    | 2.2 ± 0.0  | 1.1 ± 0.0  | 0.9 ± 0.0     | 0.9 ± 0.1 | 1.0 ± 0.1 |
| 106-116   | 9.8                                    | 2.7 ± 0.1  | 1.6 ± 0.0  | 1.4 ± 0.0     | 1.3 ± 0.0 | 1.4 ± 0.2 |
| 135-149D  | 19.4                                   | 7.8 ± 0.2  | 8.7 ± 0.2  | 7.3 ± 0.0     | 7.9 ± 0.1 | 6.4 ± 0.1 |
| 173-180   | 7.8                                    | 2.4 ± 0.0  | 1.5 ± 0.1  | 1.2 ± 0.0     | 1.3 ± 0.1 | 1.2 ± 0.1 |
| 173-181   | 8.8                                    | 2.5 ± 0.1  | 1.7 ± 0.1  | 1.3 ± 0.1     | 1.4 ± 0.1 | 1.3 ± 0.1 |
| 202-207   | 6.8                                    | 2.3 ± 0.1  | 2.2 ± 0.1  | 1.3 ± 0.1     | 1.6 ± 0.1 | 2.0 ± 0.1 |
| Residues  | Theo.<br>D <sub>max</sub>              | 10 Minutes |            |               |           |           |
|           |                                        | IIa        |            | 20:1          |           |           |
|           |                                        | 5.6        | 7.5        | GpIb $\alpha$ | $\gamma'$ | Hirudin   |
| -13 to -4 | 8.5                                    | 3.9 ± 0.2  | 3.9 ± 0.1  | 3.2 ± 0.3     | 3.2 ± 0.2 | 3.4 ± 0.2 |
| 46-52     | 6.6                                    | 0.6 ± 0.0  | 0.5 ± 0.0  | 0.4 ± 0.0     | 0.4 ± 0.1 | 0.4 ± 0.0 |
| 65-84     | 21.8                                   | 11.0 ± 0.3 | 10.6 ± 0.1 | 8.6 ± 0.2     | 8.7 ± 0.5 | 4.4 ± 0.2 |
| 85-99     | 15.2                                   | 7.7 ± 0.1  | 5.9 ± 0.0  | 2.8 ± 0.1     | 3.4 ± 0.4 | 5.4 ± 0.3 |
| 106-113   | 6.7                                    | 2.3 ± 0.0  | 1.8 ± 0.0  | 1.4 ± 0.1     | 1.4 ± 0.2 | 1.8 ± 0.1 |
| 106-116   | 9.8                                    | 3.1 ± 0.0  | 2.3 ± 0.0  | 1.8 ± 0.1     | 1.8 ± 0.2 | 2.2 ± 0.1 |
| 135-149D  | 19.4                                   | 9.7 ± 0.2  | 9.4 ± 0.1  | 8.4 ± 0.2     | 8.0 ± 0.3 | 6.8 ± 0.1 |
| 173-180   | 7.8                                    | 2.9 ± 0.1  | 2.3 ± 0.0  | 1.3 ± 0.1     | 1.4 ± 0.1 | 1.9 ± 0.2 |
| 173-181   | 8.8                                    | 3.8 ± 0.0  | 2.3 ± 0.1  | 1.3 ± 0.1     | 1.4 ± 0.1 | 2.0 ± 0.1 |
| 202-207   | 6.8                                    | 2.9 ± 0.1  | 2.8 ± 0.0  | 1.6 ± 0.1     | 2.1 ± 0.2 | 2.3 ± 0.1 |

<sup>a</sup>The maximum number of exchangeable protons within the indicated peptide, assuming 100% deuteration. A fully deuterated peptide would theoretically have acquired this amount of deuterons.
